# Supplementary material for: Olivine in an unexpected location on Vesta’s surface
Source: Springer Nature journal article supplement (doi:10.1038/nature12665), 2013-11-06
Supplement: 41586_2013_BFnature12665_MOESM16_ESM.xlsx [file 41586_2013_BFnature12665_MOESM16_ESM.xlsx]

## Sheet: eucrites
Met name	BII center	BI center
A87272	1.98	0.94
A881819	1.965	0.93
ALH78132	1.955	0.93
ALH85001	1.95	0.925
ALHA76005	1.971	0.9349
Bereba	2.015	0.94
Bouvante	2.005	0.945
Cachari	1.995	0.9405
EET87542	1.995	0.945
EET90020	2.005	0.9399
EETA79005	1.97	0.9351
GRO95533	2.015	0.94
Ibitira	1.995	0.9402
Jonzac	2.004	0.941
Juvinas	1.995	0.935
LEW87004	1.9705	0.9349
Millbillillie	2.005	0.9351
MooreCounty	1.985	0.93495
PCA82502	2.01	0.94
Padvarninkai	2.035	0.951
Pasamonte	2	0.939
SerradeMage	1.965	0.931
Stannern	2.005	0.94
Y74450	1.98	0.935
Y792510	2.005	0.942
Y792769	2.01	0.941

## Sheet: diogenites
Met name	BII center	BI center
A881526	1.905	0.919
ALH77256	1.905	0.92
AiounelAtrouss	1.92	0.925
EETA79002	1.9	0.918
GRO95555	1.919	0.92
Johnstown	1.895	0.915
LAP91900	1.915	0.92
Tatahouine	1.905	0.9195
Y74013	1.921	0.921
Y75032	1.945	0.925

## Sheet: Howardites
Met name	BII center	BI center
Bununu	1.9505	0.9301
EET83376	1.9605	0.935
EET87503	1.95	0.9302
EET87513	1.965	0.935
Frankfort	1.9501	0.9301
GRO95535	1.96	0.929
Kapoeta	1.955	0.9298
LeTeilleul	1.9452	0.93
Petersburg	1.975	0.935
QUE94200	1.93	0.925
Y7308	1.945	0.925
Y790727	1.955	0.9295
Y791573	1.9401	0.93

## Sheet: cumulates
Met name	BII center	BI center
LEW87004	1.97	0.935
A881819	1.965	0.931
ALH78132	1.955	0.93
ALHA76005	1.97	0.9351
EETA79005	1.97	0.935
LEW87004	1.97	0.9349
MooreCounty	1.985	0.935
SerradeMage	1.965	0.93
Y74450	1.98	0.935
Y792769	2.01	0.94
ALH85001	1.95	0.925
